# Supplementary material for: Pax-5 is a potent regulator of E-cadherin and breast cancer malignant processes
Source: PubMed Central journal article supplement (PMC5355325; doi:10.18632/oncotarget.14511), 2017-01-05
Supplement: oncotarget-08-12052-s001.pdf [file oncotarget-08-12052-s001.pdf]

## Pax-5 is a potent regulator of E-cadherin and breast cancer malignant processes

### SUPPLEMENTARY TABLES

**Supplementary Table 1: Cell line models**

| Cells   | Source                                      | Pathology                                 | Breast gene profile | Breast subtype |
|---------|---------------------------------------------|-------------------------------------------|---------------------|----------------|
| HEK293  | human, fetal embryonic kidney               | non-cancerous embryonic kidney            | N/A                 | N/A            |
| REH     | human lymphocyte                            | acute lymphocytic leukemia (non-T; non-B) | N/A                 | N/A            |
| Nalm-6  | human lymphocyte                            | leukemia                                  | N/A                 | N/A            |
| MB415   | human breast; derived from pleural effusion | adenocarcinoma                            | ER+/PR-             | luminal        |
| MB436   | human breast; derived from pleural effusion | invasive ductal carcinoma                 | ER-/PR-             | basal B        |
| MB468   | human breast; derived from pleural effusion | adenocarcinoma                            | ER-/PR-             | basal A        |
| BT474   | human primary breast                        | invasive ductal carcinoma                 | ER+/PR+/HER2        | luminal        |
| BT549   | human primary breast                        | invasive ductal carcinoma                 | ER-/PR-             | basal B        |
| HCC1954 | human primary breast                        | ductal carcinoma                          | ER-/PR-/HER2        | basal A        |
| MCF7    | human breast; derived from pleural effusion | invasive ductal carcinoma                 | ER+/PR+             | luminal        |
| MB231   | human breast; derived from pleural effusion | adenocarcinoma                            | ER-/PR-             | basal B        |
| T47D    | human breast; derived from pleural effusion | invasive ductal carcinoma                 | ER+/PR+             | luminal        |
| MCF12A  | human primary breast                        | non-cancerous from fibrocystic disease    | ER-/PR-             | basal B        |
| MCF10A  | human primary breast                        | non-cancerous from fibrocystic disease    | ER-/PR-             | basal B        |

Abbreviations: ER, estrogen receptor; PR, progesterone receptor; HER2, human epidermal growth factor receptor 2; ER/PR positivity, HER2 overexpression status are indicated. Cell line and expression data are derived from Neve et al. 2006. [28]

Supplementary Table 2: Pax-5 protein expression in FFPE tissue arrays

| Type/Pathology *                                    | Number (%) of Pax-5 expressing breast tissues and Scoring ** |          |           |          | Total ***  |
|-----------------------------------------------------|--------------------------------------------------------------|----------|-----------|----------|------------|
|                                                     | Score 0                                                      | Score 1  | Score 2   | Score 3  |            |
| Normal Breast Tissue                                | 1 (7%)                                                       | 1 (7%)   | 9 (64%)   | 3 (21%)  | 14         |
| Cancer adjacent normal breast tissue                | 3 (27%)                                                      | 4 (36%)  | 1 (9%)    | 3 (27%)  | 11         |
| Hyperplasia                                         | -                                                            | 5 (25%)  | 11 (55%)  | 4 (20%)  | 20         |
| Benign (fibroadenosis, fibroadenoma)                | -                                                            | 9 (28%)  | 18 (56%)  | 5 (16%)  | 32         |
| Apocrine carcinoma + Carcinosarcoma                 | -                                                            | 4 (67%)  | 2 (33%)   | -        | 6          |
| Cysto/sarcoma phyllodes                             | -                                                            | 1 (6%)   | 15 (83%)  | 2 (11%)  | 18         |
| Invasive ductal carcinoma                           | -                                                            | 29 (23%) | 80 (63%)  | 18 (14%) | 127        |
| Invasive lobular carcinoma                          | -                                                            | 2 (25%)  | 2 (25%)   | 4 (50%)  | 8          |
| Medullary carcinoma                                 | -                                                            | 3 (14%)  | 10 (45%)  | 9 (41%)  | 22         |
| <b>Malignant</b> Mixed lobular and ductal carcinoma | -                                                            | -        | 2 (100%)  | -        | 2          |
| Mucinous adenocarcinoma                             | 3 (14%)                                                      | 7 (32%)  | 12 (55%)  | -        | 22         |
| Neuroendocrine carcinoma                            | -                                                            | -        | 2 (100%)  | -        | 2          |
| Tubular carcinoma                                   | 1 (17%)                                                      | 1 (17%)  | 4 (67%)   | -        | 6          |
| Paget's disease                                     | -                                                            | 2 (25%)  | 5 (63%)   | 1 (13%)  | 8          |
| DCIS + Intraductal carcinoma                        | -                                                            | 2 (25%)  | 6 (75%)   | -        | 8          |
| <b>Total</b>                                        | 8 (3%)                                                       | 70 (22%) | 179 (58%) | 49 (16%) | 306 (100%) |

\* As diagnosed by pathologists at Tissue Array Networks; DCIS = Ductal Carcinoma *In Situ*

\*\* Score 0 = No expression, Score 1 = weak, Score 2 = moderate, Score 3 = strong

\*\*\* Total number of duplicate samples from T082, BRC961, BR961 and BR1006 TMAs

Abbreviation: DCIS = Ductal Carcinoma *in situ*

Supplementary Table 3: PCR primers

|                                 | Forward primers (5'→3')           | Reverse primers (5'→3')           |
|---------------------------------|-----------------------------------|-----------------------------------|
| <b>HPRT</b>                     | TGA CAC TGG CAA AAC AAT GCA       | GGT CTT TTT CAC CGA CAA GCT       |
| <b>Pax-5<math>\alpha</math></b> | GCG CAA GAG AGA CGA AGG T         | CTG CTG CTG TGT GAA CAA GTC       |
| <b>Pax-5<math>\beta</math></b>  | TTG GCA CGA GGT AGA CAC           | AGC CCT CCA ACA CTG AGA           |
| <b>Pax-5 (EMSA)</b>             | Biotin-GAA TGG GGC ACT GAG GCG TG | Biotin-CAC GCC TCA GTG CCC CAT TC |
| <b>Ecad (EMSA)</b>              | Biotin-CTT CAG CCC AGG AGT TC     | Biotin-CGG TGG CTC ACT AAG AC     |
| <b>CD19</b>                     | CCA CCT GGA GAT CAC TG            | ATA AGC CAA AGT CAC AGC           |
| <b>MMP2</b>                     | GCG GCG GTC ACA GCT ACT           | GAC GCT CTT GAG ACT TTG           |
| <b>MMP9</b>                     | GTG CTG GGC TGC TGC TTT GCT G     | TTT CGA CTC TCC ACG GAT CTC T     |
| <b>Vimentin</b>                 | CAA CCT GGC CGA GGA CAT           | ACG CAT TGT CAA CAT CCT GTC T     |
| <b>Fibronectine</b>             | CCG CCG AAT GTA GGA CAA GA        | TGC CAA CAG GAT GAC ATG AAA       |
| <b>E-cadherin</b>               | CAA GCT ATC CTT GCA CCT CAG       | GCA TCA AGA GAA CTC CTA TCT TG    |
| <b>Zeb-1</b>                    | GCC AAT AAG CAA ACG ATT CTG       | TTT GGC TGG ATC ACT TTC AAG       |
| <b>Snail</b>                    | GCT GCA GGA CTC TAA TCC AGA GTT   | GAC AGA GTC CCA GAT GAG CAT TG    |
| <b>Slug</b>                     | GCA GTG AGG GCA AGA AAAAG         | GCG ATG CCC AGT CTA GAA AA        |
| <b>Twist</b>                    | GGA GTC CGC AGT CTT ACG AG        | TCT GGA CCT GGT AGA GG            |
